# Supplementary material for: Estimation of Nitrogen Supply for Summer Maize Production through a Long-Term Field Trial in China
Source: MDPI journal article supplement (doi:10.3390/agronomy11071358), 2021-07-02
Supplement: s1 [file s1]

## **Estimation of nitrogen supply for summer maize production through a long-term field trial in China**

Shaohui Huang<sup>a, b</sup>, Wenfang Yang<sup>b</sup>, Wencheng Ding<sup>a</sup>, Liangliang Jia<sup>b</sup>, Lingling Jiang<sup>a</sup>, Yingxia Liu<sup>a</sup>, Xinpeng Xu<sup>a</sup>, Yunma Yang<sup>b</sup>, Ping He<sup>a\*</sup>, Junfang Yang<sup>b\*\*</sup>

<sup>a</sup> *Key Laboratory of Plant Nutrition and Fertilizer, Ministry of Agriculture and Rural Affairs / Institute of Agricultural Resources and Regional Planning, Chinese Academy of Agricultural Sciences, Beijing 100081, P.R. China*

<sup>b</sup> *Hebei Fertilizer Technology Innovation Centre, Institute of Agricultural Resources and Environment, Hebei Academy of Agriculture and Forestry Sciences, Shijiazhuang 050051, P.R. China*

\*Corresponding authors: Dr. Ping He

E-mail addresses: heping02@caas.cn

Tel: +86-10-82105638

Permanent address: Institute of Agricultural Resources and Regional Planning, Chinese Academy of Agricultural Sciences, CAAS. No. 12, Zhongguancun South Street, Beijing 100081, PR China.

\*\*Corresponding authors: Prof. Junfang Yang

E-mail addresses: heping02@caas.cn

Tel: +86-311-87652139

Institute of Agricultural Resources and Environment, Hebei Academy of Agriculture and Forestry Sciences, No. 598, Heping Road, Shijiazhuang 050051, P.R. China

Table S1 Variety, seed density and fertilizer rate of summer maize in NE and FP treatments from  
2009 to 2019

| Year      | Crop         | NE          |                                                  |                                           |                               |                  | FP          |                                                  |                                           |                               |                  |
|-----------|--------------|-------------|--------------------------------------------------|-------------------------------------------|-------------------------------|------------------|-------------|--------------------------------------------------|-------------------------------------------|-------------------------------|------------------|
|           |              | Variety     | Seed<br>density<br>(plants<br>ha <sup>-1</sup> ) | Fertilizer rate (kg<br>ha <sup>-1</sup> ) |                               |                  | Variety     | Seed<br>density<br>(plants<br>ha <sup>-1</sup> ) | Fertilizer rate (kg<br>ha <sup>-1</sup> ) |                               |                  |
|           |              |             |                                                  | N                                         | P <sub>2</sub> O <sub>5</sub> | K <sub>2</sub> O |             |                                                  | N                                         | P <sub>2</sub> O <sub>5</sub> | K <sub>2</sub> O |
| 2009-2010 | Summer maize | ZhengDan958 | 60 000                                           | 240                                       | 60                            | 90               | ZhengDan958 | 60 000                                           | 140                                       | 138                           | 0                |
|           | Winter wheat | XingMai6    | 225                                              | 180                                       | 90                            | 90               | XingMai6    | 225                                              | 300                                       | 170                           | 50               |
| 2010-2011 | Summer maize | ZhengDan958 | 60 000                                           | 180                                       | 60                            | 90               | ZhengDan958 | 60 000                                           | 300                                       | 135                           | 0                |
|           | Winter wheat | XingMai6    | 225                                              | 120                                       | 60                            | 80               | XingMai6    | 225                                              | 225                                       | 120                           | 50               |
| 2011-2012 | Summer maize | ZhengDan958 | 60 000                                           | 150                                       | 40                            | 50               | ZhengDan958 | 60 000                                           | 300                                       | 135                           | 0                |
|           | Winter wheat | XingMai6    | 225                                              | 170                                       | 75                            | 70               | XingMai6    | 225                                              | 225                                       | 120                           | 50               |
| 2012-2013 | Summer maize | ZhengDan958 | 60 000                                           | 182                                       | 67                            | 65               | ZhengDan958 | 60 000                                           | 225                                       | 80                            | 20               |
|           | Winter wheat | XingMai6    | 225                                              | 182                                       | 107                           | 86               | XingMai6    | 225                                              | 225                                       | 120                           | 50               |
| 2013-2014 | Summer maize | ZhengDan958 | 60 000                                           | 182                                       | 73                            | 70               | ZhengDan958 | 60 000                                           | 225                                       | 120                           | 50               |
|           | Winter wheat | XingMai6    | 225                                              | 182                                       | 107                           | 86               | XingMai6    | 225                                              | 225                                       | 120                           | 50               |
| 2014-2015 | Summer maize | XianYu335   | 75 000                                           | 182                                       | 85                            | 90               | ZhengDan958 | 60 000                                           | 225                                       | 120                           | 50               |
|           | Winter wheat | XingMai6    | 225                                              | 182                                       | 107                           | 86               | XingMai6    | 225                                              | 225                                       | 120                           | 50               |
| 2015-2016 | Summer maize | XianYu335   | 75 000                                           | 182                                       | 73                            | 70               | ZhengDan958 | 60 000                                           | 225                                       | 120                           | 50               |
|           | Winter wheat | XingMai6    | 225                                              | 182                                       | 107                           | 86               | XingMai6    | 225                                              | 225                                       | 120                           | 50               |
| 2016-2017 | Summer maize | XianYu335   | 75 000                                           | 182                                       | 73                            | 70               | ZhengDan958 | 60 000                                           | 225                                       | 120                           | 50               |
|           | Winter wheat | XingMai6    | 225                                              | 182                                       | 107                           | 86               | XingMai6    | 225                                              | 225                                       | 120                           | 50               |
| 2017-2018 | Summer maize | XianYu335   | 75 000                                           | 182                                       | 73                            | 70               | ZhengDan958 | 60 000                                           | 225                                       | 120                           | 50               |
|           | Winter wheat | XingMai6    | 225                                              | 182                                       | 107                           | 86               | XingMai6    | 225                                              | 225                                       | 120                           | 50               |
| 2018-2019 | Summer maize | XianYu335   | 75 000                                           | 182                                       | 73                            | 70               | ZhengDan958 | 60 000                                           | 225                                       | 120                           | 50               |
|           | Winter wheat | XingMai6    | 225                                              | 182                                       | 107                           | 86               | XingMai6    | 225                                              | 225                                       | 120                           | 50               |
| 2019-2020 | Summer maize | XianYu335   | 75 000                                           | 182                                       | 73                            | 70               | ZhengDan958 | 60 000                                           | 225                                       | 120                           | 50               |
|           | Winter wheat | XingMai6    | 225                                              | 182                                       | 107                           | 86               | XingMai6    | 225                                              | 225                                       | 120                           | 50               |

Note: NE: Nutrient Expert treatment; FP: Famers' Practice treatment.
